# Supplementary material
Source: PubMed Central journal article supplement (PMC6533780)
Supplement: Supp_Fig1.pdf [file Supp_Fig1.pdf]

## Supplementary Data

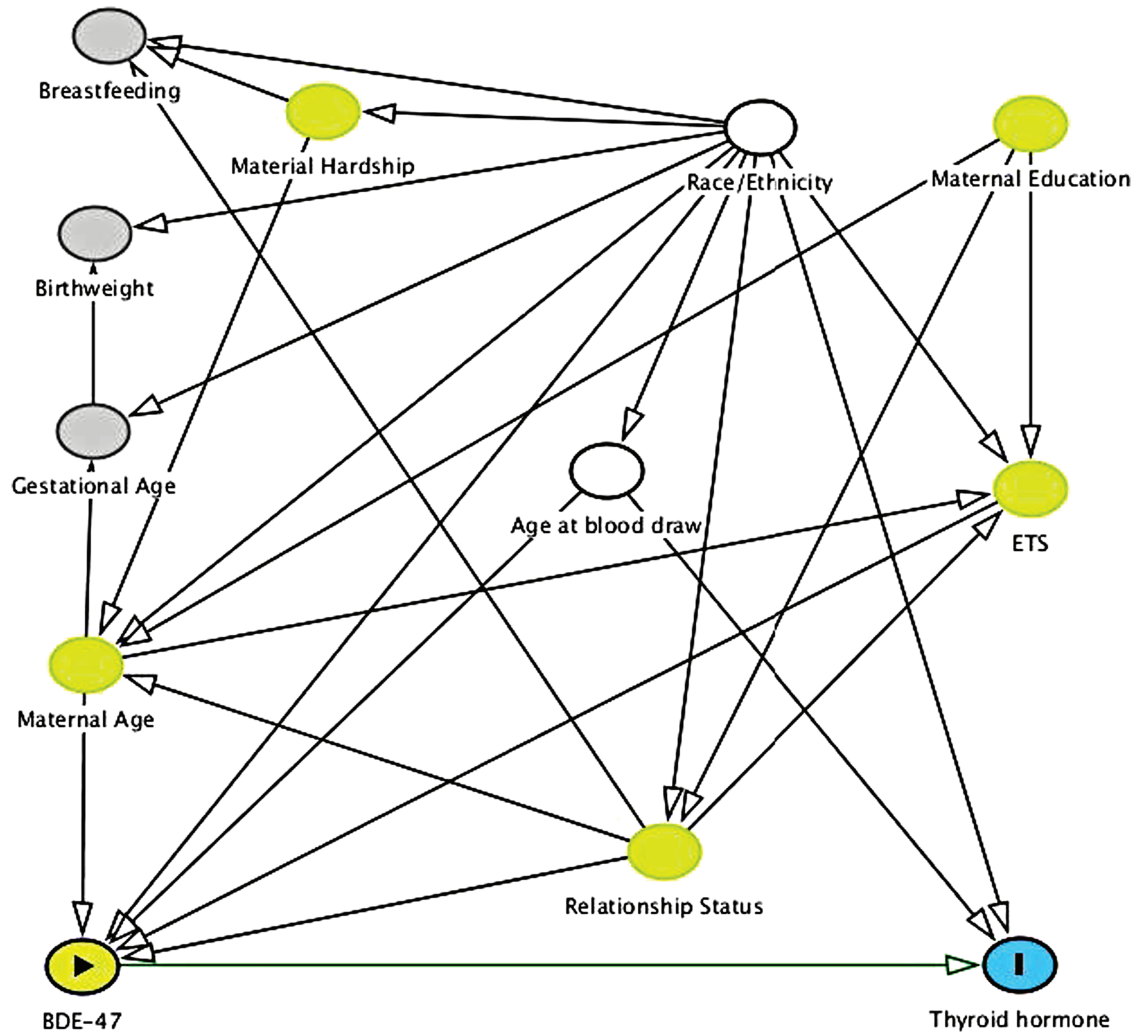

**SUPPLEMENTARY FIG. S1.** Directed acyclic graph for covariate selection. The green line represents the causal path between exposure (BDE-47) and outcome (thyroid parameter). Green/yellow circles represent ancestors of the exposure, gray circles represent variables not on a biasing path but related to an ancestor of exposure, white circles represent ancestors of the exposure and the outcome that are sufficient to close biasing paths when adjusted for. As illustrated, adjusting for ethnicity and age at blood draw is sufficient to estimate the unconfounded association between BDE-47 and thyroid hormone parameters. Additionally, sex and parity, were examined. However, these variables are excluded from the diagram, as they were not associated with the exposure, the outcome, or any ancestor of these variables. Diagram generated in DAGitty v2.3 available at [www.dagitty.net/](http://www.dagitty.net/)
