# Supplementary material
Source: PubMed Central journal article supplement (PMC6533780)
Supplement: Supp_Fig2.pdf [file Supp_Fig2.pdf]

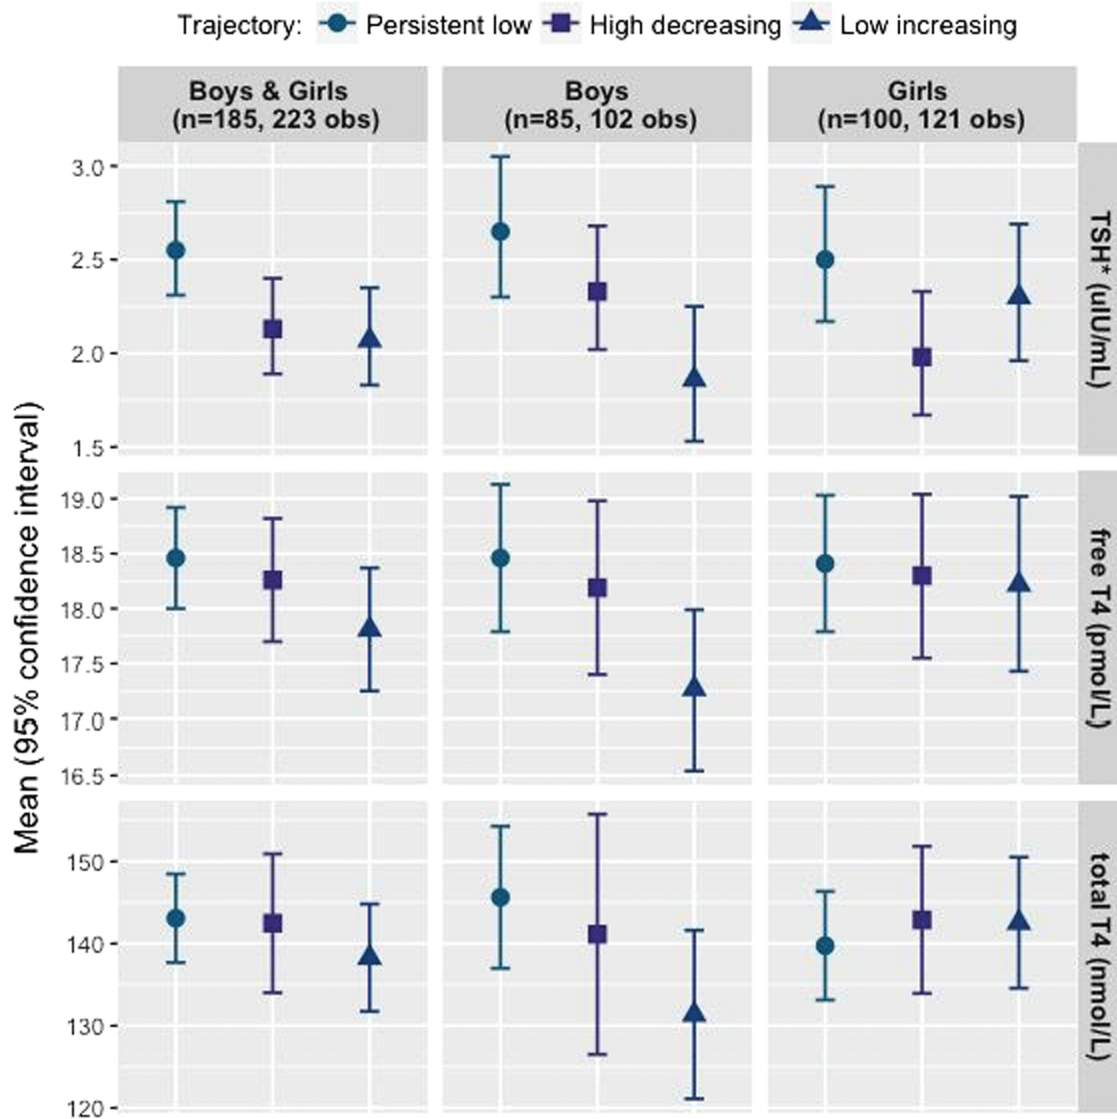

**SUPPLEMENTARY FIG. S2.** Sex-specific associations ( $\beta$  [CI]) between BDE-47 trajectories (ng/g lipid) and serum thyroid parameters.
