# Supplementary material
Source: PubMed Central journal article supplement (PMC6533780)
Supplement: Supp_Table1.pdf [file Supp_Table1.pdf]

SUPPLEMENTARY TABLE S1. CRITERIA (BIC  
AND  $2\log_e(B_{10})$ ) FOR EVALUATING TRAJECTORY FIT

| <i>Null versus<br/>alternative<br/>model (number<br/>of trajectories)</i> | <i>BIC</i>         | $2\log_e(B_{10}) \approx 2(\Delta BIC)$ |
|---------------------------------------------------------------------------|--------------------|-----------------------------------------|
| <b>BDE-47</b>                                                             |                    |                                         |
| 2 vs. <b><u>3</u></b>                                                     | -352.01 vs -343.89 | <b><u>16.24</u></b>                     |
| 3 vs. <u>4</u>                                                            | -343.89 vs -343.97 | -0.16                                   |
| 4 vs. 5                                                                   | -343.97 vs -350.78 | -13.62                                  |

$2\log_e(B_{10})$ : interpreted as the degree of evidence favoring the alternative model. Bold underlined text indicates the selected model.
