# Supplementary material
Source: PubMed Central journal article supplement (PMC6533780)
Supplement: Supp_Table2.pdf [file Supp_Table2.pdf]

SUPPLEMENTARY TABLE S2. PERCENTILES OF PLASMA BDE-47 (NG/G LIPID) CONCENTRATIONS MEASURED IN CHILDREN ENROLLED IN THE CCCEH COHORT

|       | N   | % <LOD | 0   | 1   | 5   | 10  | 25   | 50   | 75    | 90    | 95    | 99    | 100   |
|-------|-----|--------|-----|-----|-----|-----|------|------|-------|-------|-------|-------|-------|
| Cord  | 327 | 20     | 1.3 | 2.7 | 3.2 | 3.9 | 5.6  | 12.3 | 29.0  | 63.7  | 98.5  | 228.2 | 364.8 |
| Age 2 | 56  | 0      | 5.6 | 5.4 | 7.2 | 8.1 | 15.8 | 28.2 | 103.9 | 149.0 | 272.1 | 400.9 | 400.9 |
| Age 3 | 115 | 1      | 4.6 | 4.6 | 6.2 | 7.7 | 14.6 | 31.3 | 67.8  | 120.0 | 207.6 | 291.2 | 350.9 |

Values for plasma BDE-47 concentrations below the sample-specific limit of detection (LOD) were imputed using a distribution based multiple imputation approach, as described in the manuscript.
