# Supplementary material
Source: PubMed Central journal article supplement (PMC6533780)
Supplement: Supp_Table3.pdf [file Supp_Table3.pdf]

SUPPLEMENTARY TABLE S3. ASSOCIATIONS ( $\beta$  [CI]) BETWEEN BDE-47 TRAJECTORIES (NG/G LIPID) AND SERUM THYROID PARAMETERS

|                                          | <i>Log<sub>10</sub>TSH</i> ( $\mu$ IU/mL) | <i>Free T4</i> (pmol/L) | <i>Total T4</i> (nmol/L) |
|------------------------------------------|-------------------------------------------|-------------------------|--------------------------|
| Adjusted for age and ethnicity           |                                           |                         |                          |
| Persistent low                           | Reference                                 | Reference               | Reference                |
| Prenatal high                            | -0.08 [-0.15 to -0.01]                    | -0.20 [-0.92 to 0.52]   | -0.61 [-10.66 to 9.44]   |
| Postnatal high                           | -0.09 [-0.16 to -0.02]                    | -0.65 [-1.37 to 0.07]   | -4.80 [-13.11 to 3.51]   |
| Adjusted for age only                    |                                           |                         |                          |
| Persistent low                           | Reference                                 | Reference               | Reference                |
| Prenatal high                            | -0.10 [-0.16 to -0.03]                    | -0.21 [-0.94 to 0.52]   | 1.14 [-8.96 to 11.24]    |
| Postnatal high                           | -0.10 [-0.17 to -0.03]                    | -0.66 [-1.38 to 0.07]   | -4.36 [-12.74 to 4.02]   |
| Adjusted for all covariates <sup>a</sup> |                                           |                         |                          |
| Persistent low                           | Reference                                 | Reference               | Reference                |
| Prenatal high                            | -0.09 [-0.16 to -0.01]                    | -0.04 [-0.78 to 0.70]   | 0.76 [-8.56 to 10.09]    |
| Postnatal high                           | -0.09 [-0.16 to -0.02]                    | -0.66 [-1.35 to 0.02]   | -5.39 [-13.87 to 3.09]   |

All models 185 children and 223 observations.

<sup>a</sup>Child age at blood draw, ethnicity, sex, gestational age, birth weight, maternal age at delivery, employment, education, marital status, parity, material hardship, prenatal environmental tobacco smoke exposure, and breast-feeding history.
