# Supplementary material
Source: PubMed Central journal article supplement (PMC6533780)
Supplement: Supp_Table4.pdf [file Supp_Table4.pdf]

SUPPLEMENTARY TABLE S4. AGE- AND ETHNICITY-ADJUSTED ASSOCIATIONS ( $\beta$  [CI]) BETWEEN BDE-47 TRAJECTORIES (NG/G LIPID) AND SERUM THYROID PARAMETERS MEASURED AT THREE YEARS, FIVE YEARS, OR THREE AND FIVE YEARS

|                                  | <i>Log<sub>10</sub>TSH (<math>\mu</math>IU/mL)</i> | <i>Free T4 (pmol/L)</i> | <i>Total T4 (nmol/L)</i> |
|----------------------------------|----------------------------------------------------|-------------------------|--------------------------|
| Age 3 years ( <i>n</i> =150)     |                                                    |                         |                          |
| Persistent low                   | Reference                                          | Reference               | Reference                |
| High decreasing                  | -0.05 [-0.14 to 0.03]                              | -0.29 [-1.20 to 0.62]   | -1.88 [-12.37 to 8.60]   |
| Low increasing                   | -0.06 [-0.14 to 0.02]                              | -0.38 [-1.19 to 0.42]   | -3.37 [-12.63 to 5.89]   |
| Age 5 years ( <i>n</i> =73)      |                                                    |                         |                          |
| Persistent low                   | Reference                                          | Reference               | Reference                |
| High decreasing                  | -0.14 [-0.26 to -0.03]                             | -0.13 [-1.42 to 1.16]   | -0.52 [-18.91 to 17.87]  |
| Low increasing                   | -0.17 [-0.28 to -0.06]                             | -1.45 [-2.63 to -0.28]  | -6.90 [-23.68 to 9.88]   |
| GEE (3 and 5 years) <sup>a</sup> |                                                    |                         |                          |
| Persistent low                   | Reference                                          | Reference               | Reference                |
| High decreasing                  | -0.08 [-0.15 to -0.01]                             | -0.20 [-0.92 to 0.52]   | -0.61 [-10.66 to 9.44]   |
| Low increasing                   | -0.09 [-0.16 to -0.02]                             | -0.65 [-1.37 to 0.07]   | -4.80 [-13.11 to 3.51]   |

<sup>a</sup>185 children and 223 observations.
