# Supplementary material
Source: PubMed Central journal article supplement (PMC6533780)
Supplement: Supp_Table5.pdf [file Supp_Table5.pdf]

SUPPLEMENTARY TABLE S5. AGE- AND ETHNICITY-ADJUSTED ASSOCIATIONS ( $\beta$  [CI]) BETWEEN CONTINUOUS BDE-47 (NG/G LIPID) AND SERUM THYROID PARAMETERS MEASURED BETWEEN 3 AND 5 YEARS USING THE GEE APPROACH

| <i>Age of BDE-47 sample</i>        | <i>Log<sub>10</sub>TSH (<math>\mu</math>IU/mL)</i> | <i>Free T4 (pmol/L)</i> | <i>Total T4 (nmol/L)</i> |
|------------------------------------|----------------------------------------------------|-------------------------|--------------------------|
| Cord plasma <sup>a</sup>           | -0.05 [-0.10 to 0.01]                              | -0.04 [-0.08 to 0.00]   | -0.26 [-0.87 to 0.36]    |
| Three-year-old plasma <sup>b</sup> | -0.01 [-0.10 to 0.09]                              | -0.01 [-0.10 to 0.07]   | 0.56 [-0.23 to 1.35]     |

<sup>a</sup>223 observations, 185 subjects.

<sup>b</sup>72 observations, 60 subjects.
