# Supplementary material
Source: PubMed Central journal article supplement (PMC6533780)
Supplement: Supp_Table6.pdf [file Supp_Table6.pdf]

SUPPLEMENTARY TABLE S6. EXPOSURE (BDE-47 TRAJECTORY) AND OUTCOME (THYROID HORMONE PARAMETERS) CHARACTERISTICS OF INCLUDED CHILDREN, STRATIFIED BY SEX

|                     | <i>Boys</i>      | <i>Girls</i>     |
|---------------------|------------------|------------------|
| BDE-47 trajectory   |                  |                  |
| Persistent low      | 37 (44)          | 40 (40)          |
| High decreasing     | 21 (25)          | 25 (25)          |
| Low increasing      | 27 (32)          | 35 (35)          |
| TSH ( $\mu$ IU/mL)* |                  |                  |
| Age 3 years         | 2.4 $\pm$ 0.1    | 2.3 $\pm$ 0.1    |
| Age 5 years         | 2.1 $\pm$ 0.2    | 2.1 $\pm$ 0.2    |
| Free T4 (pmol/L)    |                  |                  |
| Age 3 years         | 18.1 $\pm$ 2.1   | 18.4 $\pm$ 2.3   |
| Age 5 years         | 18.1 $\pm$ 2.4   | 18.2 $\pm$ 2.2   |
| Total T4 (nmol/L)   |                  |                  |
| Age 3 years         | 139.5 $\pm$ 27.9 | 141.5 $\pm$ 23.0 |
| Age 5 years         | 151.5 $\pm$ 38.0 | 142.1 $\pm$ 25.3 |

\*Geometric mean.
