# Supplementary material
Source: PubMed Central journal article supplement (PMC6533780)
Supplement: Supp_Table7.pdf [file Supp_Table7.pdf]

SUPPLEMENTARY TABLE S7. SEX-SPECIFIC ASSOCIATIONS ( $\beta$  [CI]) BETWEEN BDE-47 TRAJECTORIES (NG/G LIPID) AND SERUM THYROID PARAMETERS

|                                      | <i>High decreasing vs. persistent low</i> |                        |              | <i>Low increasing vs. persistent low</i> |                          |              | <i>p-int</i> |
|--------------------------------------|-------------------------------------------|------------------------|--------------|------------------------------------------|--------------------------|--------------|--------------|
|                                      | <i>Boys</i>                               | <i>Girls</i>           | <i>p-int</i> | <i>Boys</i>                              | <i>Girls</i>             | <i>p-int</i> |              |
| Log <sub>10</sub> TSH ( $\mu$ IU/mL) | -0.06 [-0.15 to 0.03]                     | -0.10 [-0.20 to -0.00] | 0.54         | -0.15 [-0.26 to -0.05]                   | -0.04 [-0.13 to 0.05]    | 0.12         |              |
| Free T4 (pmol/L)                     | -0.27 [-1.32 to 0.79]                     | -0.12 [-1.06 to 0.83]  | 0.78         | -1.19 [-2.18 to -0.20]                   | -0.19 to [-1.19 to 0.82] | 0.21         |              |
| Total T4 (nmol/L)                    | -4.50 [-21.69 to 12.69]                   | 3.15 [-7.94 to 14.23]  | 0.67         | -14.28 [-27.48 to -1.07]                 | 2.80 [-7.32 to 12.92]    | 0.06         |              |

185 children and 223 observations.
