# Supplementary material
Source: PubMed Central journal article supplement (PMC6533780)
Supplement: Supp_Table8.pdf [file Supp_Table8.pdf]

SUPPLEMENTARY TABLE S8. SUMMARY OF BDE-47 CONCENTRATION (MEDIAN) AND TSH (GM±GSD), TOTAL T4 (M±SD), AND FREE T4 (M±SD) LEVELS MEASURED IN MATERNAL,<sup>a</sup> CORD, INFANT, OR CHILD BLOOD BY NINE NORTH AMERICAN BIRTH COHORT STUDIES

| <i>Study, first author (reference)</i> | <i>N<sup>b</sup></i> | <i>BDE-47 sample (age, years)</i> | <i>BDE-47 (ng/g lipid)</i> | <i>Thyroid sample (age, years)</i> | <i>TSH (μIU/mL)</i> | <i>Total T4 (μg/dL)</i> | <i>Free T4 (ng/dL)</i> |
|----------------------------------------|----------------------|-----------------------------------|----------------------------|------------------------------------|---------------------|-------------------------|------------------------|
| Chevrier 2010 (S1)                     | 270                  | Maternal blood                    | 15.0                       | Maternal blood                     | 1.2±1.7             | 10.7±1.6                | 0.8±0.2                |
| Stapleton 2011 (S2)                    | 136                  | Maternal blood                    | 18.9                       | Maternal blood                     | 1.3                 | 6.1 <sup>c</sup>        | 0.7 <sup>d</sup>       |
| Vuong 2015 (S3)                        | 187                  | Maternal blood                    | 19.1                       | Maternal blood                     | 1.2±2.2             | 10.3±1.9                | 0.7±0.1                |
| Abdelouahab 2013 <sup>c</sup> (S4)     | 380                  | Maternal blood                    | 21.5                       | Maternal blood                     | 1.4±0.8             | 9.1±2.2                 | 1.1±0.1                |
| Abdelouahab 2013 <sup>c</sup> (S4)     | 260                  | Maternal blood                    | 21.5                       | Maternal blood <sup>e</sup>        | 2.2±1.2             | 8.9±1.9                 | 0.8±0.1                |
| Abdelouahab 2013 <sup>c</sup> (S4)     | 260                  | Maternal blood                    | 21.5                       | Cord blood                         | 9.4±6.2             | 9.0±1.7                 | 1.0±0.1                |
| Vuong 2015 (S3)                        | 256                  | Maternal blood                    | 19.1                       | Cord blood                         | 7.1±1.8             | 9.6±1.8                 | 1.0±0.2                |
| Herbstman 2008 (S5)                    | 286                  | Cord blood                        | 13.8                       | Cord blood                         | 6.7±1.9             | 10.5±2.2                | 1.1±0.2                |
| Herbstman 2008 (S5)                    | 265                  | Cord blood                        | 13.8                       | Infant blood                       | NA                  | 19.0±5.0                | NA                     |
| Herbstman 2008 (S5)                    | 139                  | Cord blood                        | 13.8                       | Infant blood                       | NA                  | 15.2±3.9                | NA                     |
| Chevrier 2011 (S6)                     | 288                  | Maternal blood                    | 15.2                       | Infant blood                       | 5.7±1.8             | NA                      | NA                     |
| Jacobson 2016 (S7)                     | 80                   | Child blood (1–5 years)           | 36.2                       | Child blood (1–5 years)            | 1.6                 | 9.0                     | 1.0                    |
| Vuong 2018 (S8)                        | 142                  | Maternal blood                    | 19.5                       | Child blood (3 years)              | 2.0±1.6             | 8.8±1.2                 | 0.9±0.1                |
| Vuong 2018 (S8)                        | 142                  | Child blood (2 years)             | 58.6                       | Child blood (3 years)              | 2.0±1.6             | 8.8±1.2                 | 0.9±0.1                |
| Cowell 2019                            | 205                  | Cord blood                        | 11.8                       | Child blood (3–5 years)            | 2.2±0.1             | 11.1±2.2                | 1.4±0.2                |
| Cowell 2019                            | 205                  | Child blood (2–3 years)           | 40.4                       | Child blood (3–5 years)            | 2.2±0.1             | 11.1±2.2                | 1.4±0.2                |

<sup>a</sup>Collected during pregnancy.

<sup>b</sup>Sample size refers to the subset of participants included in manuscript analyses.

<sup>c</sup>Total T4 converted to μg/dL using nmol/L×0.078.

<sup>d</sup>Free T4 converted to ng/dL using pmol/L×0.078.

<sup>e</sup>Measured during delivery.

## Supplementary References

- S1. Chevrier J, Harley KG, Bradman A, Gharbi M, Sjodin A, Eskenazi B 2010 Polybrominated diphenyl ether (PBDE) flame retardants and thyroid hormone during pregnancy. *Environ Health Perspect* **118**:1444–1449.
- S2. Stapleton HM, Eagle S, Anthopolos R, Wolkin A, Miranda ML 2011 Associations between polybrominated diphenyl ether (PBDE) flame retardants, phenolic metabolites, and thyroid hormones during pregnancy. *Environ Health Perspect* **119**:1454–1459.
- S3. Vuong AM, Webster GM, Romano ME, Braun JM, Zoeller RT, Hoofnagle AN, Sjodin A, Yolton K, Lanphear BP, Chen A 2015 Maternal polybrominated diphenyl ether (PBDE) exposure and thyroid hormones in maternal and cord sera: the HOME Study, Cincinnati, USA. *Environ Health Perspect* **123**:1079–1085.
- S4. Abdelouahab N, Langlois MF, Lavoie L, Corbin F, Pasquier JC, Takser L 2013 Maternal and cord-blood thyroid hormone levels and exposure to polybrominated diphenyl ethers and polychlorinated biphenyls during early pregnancy. *Am J Epidemiol* **178**:701–713.
- S5. Herbstman JB, Sjodin A, Apelberg BJ, Witter FR, Halden RU, Patterson DG, Panny SR, Needham LL, Goldman LR 2008 Birth delivery mode modifies the associations between prenatal polychlorinated biphenyl (PCB) and polybrominated diphenyl ether (PBDE) and neonatal thyroid hormone levels. *Environ Health Perspect* **116**:1376–1382.
- S6. Chevrier J, Harley KG, Bradman A, Sjodin A, Eskenazi B 2011 Prenatal exposure to polybrominated diphenyl ether flame retardants and neonatal thyroid-stimulating hormone levels in the CHAMACOS study. *Am J Epidemiol* **174**:1166–1174.
- S7. Jacobson MH, Barr DB, Marcus M, Muir M, Muir AB, Lyles RH, Howards PP, Pardo L, Darrow LA 2016 Serum polybrominated diphenyl ether concentrations and thyroid function in young children. *Environ Res* **149**:222–230.
- S8. Vuong A, Braun JM, Webster GM, Zoeller RT, Hoofnagle AN, Sjodin A, Yolton K, Lanphear BP, Chen A 2018 Polybrominated diphenyl ether (PBDE) exposures and thyroid hormones in children at age 3 years. *Environ Int* **117**:339–347.
